# Supplementary material for: Identifying Key Sites of Green Infrastructure to Support Ecological Restoration in the Urban Agglomeration
Source: MDPI journal article supplement (doi:10.3390/land10111196), 2021-11-05
Supplement: s1 [file s1]

Archive with 1 entries (1 files):
- land-1436032-supplementary.pdf
