# Supplementary material for: Identifying Key Sites of Green Infrastructure to Support Ecological Restoration in the Urban Agglomeration
Source: MDPI journal article supplement (doi:10.3390/land10111196), 2021-11-05
Supplement: s1 [file s1 › land-1436032-supplementary.pdf]

## Supplementary Materials:

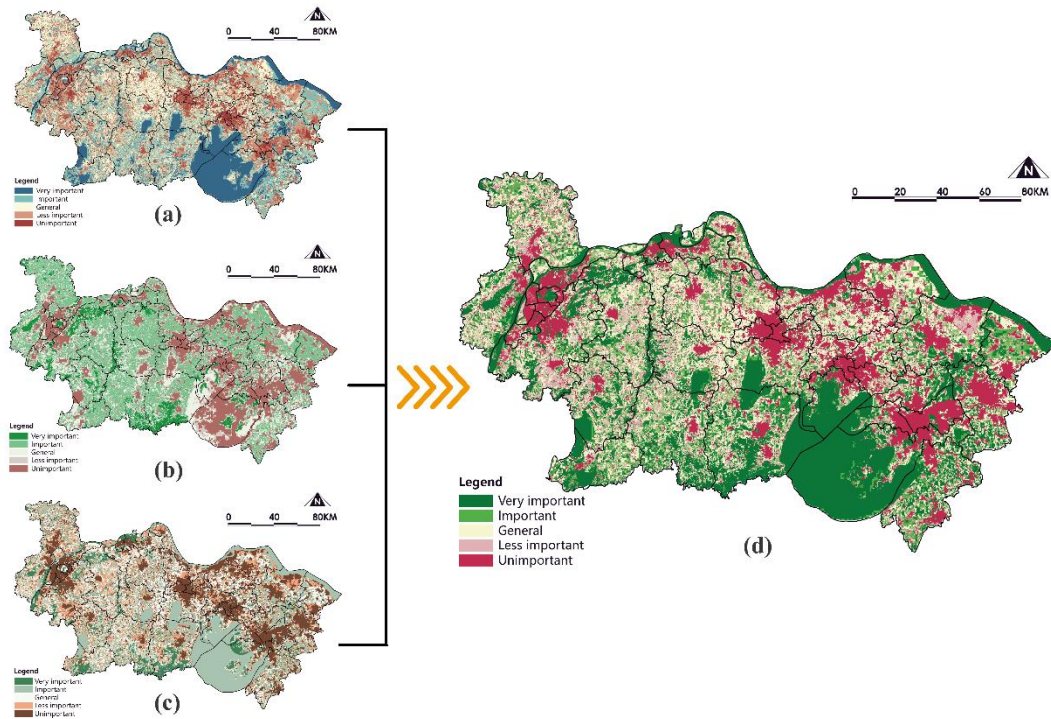

**Figure S1.** The spatial distribution of the ecosystem service in the study area: (a) water conservation assessment; (b) soil conservation assessment; (c) biodiversity conservation assessment; (d) ecosystem service assessment.

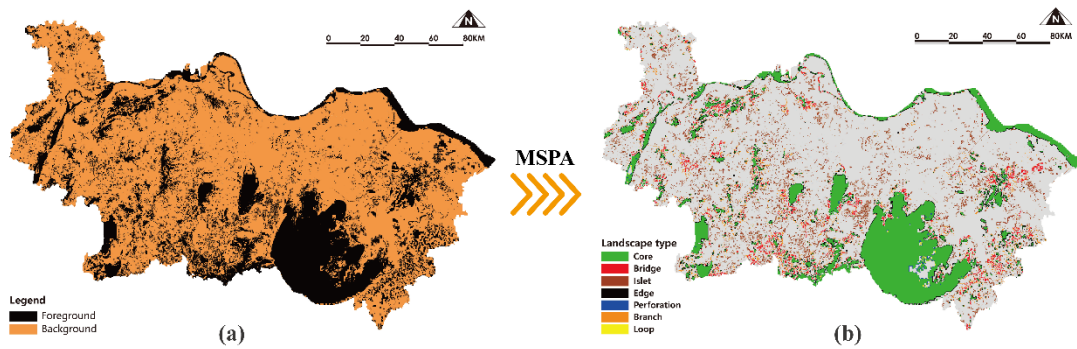

**Figure S2.** Landscape types in the study area by MSPA

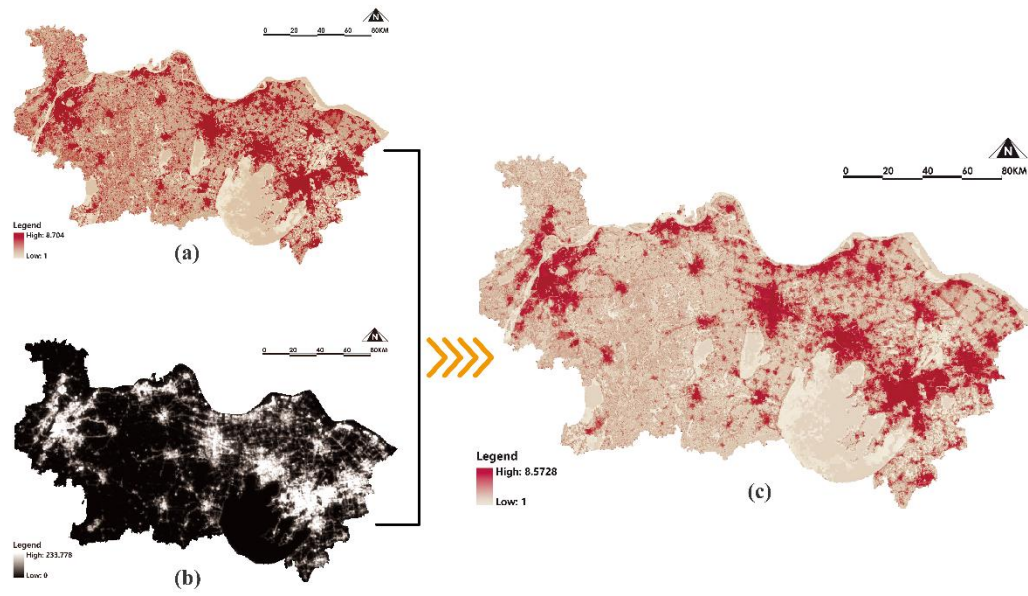

**Figure S3.** The integrated resistance surface of the study area: (a) the ecological resistance surface; (b) night light data; (c) the integrated resistance surface.
